# Supplementary material
Source: PubMed Central journal article supplement (PMC4785931)
Supplement: rsbl20150929supp1.pdf [file rsbl20150929supp1.pdf]

**Electronic Supplementary Material 1. Population samples used in this study.** Code is the code used by the 1000 genomes project, N is the number of individuals processed in the current study. Almost all available individuals were analysed, the exceptions being a small number of unusually small file sizes and failed run.

| <b>Code</b> | <b>population</b> | <b>region</b> | <b>N</b> |
|-------------|-------------------|---------------|----------|
| GWD         | Gambia            | Africa        | 109      |
| ESN         | Esan              | Africa        | 85       |
| MSL         | Mende             | Africa        | 79       |
| YRI         | Yoruba            | Africa        | 51       |
| LWK         | Luhya             | Africa        | 31       |
| BEB         | Bengal            | CS Asia       | 75       |
| PJL         | Punjab            | CS Asia       | 43       |
| STU         | Sri Lanka         | CS Asia       | 94       |
| ITU         | Indian Telugu     | CS Asia       | 86       |
| CHS         | Southern Han      | E Asia        | 40       |
| KHV         | Korea             | E Asia        | 47       |
| CDX         | Chinese Dai       | E Asia        | 31       |
| CHB         | Han, Beijing      | E Asia        | 70       |
| JPT         | Japan             | E Asia        | 35       |
| GBR         | Britain           | Europe        | 40       |
| FIN         | Finland           | Europe        | 31       |
| IBS         | Spain             | Europe        | 51       |
| TSI         | Italy             | Europe        | 111      |
